# Supplementary material for: A novel feature extraction scheme for prediction of protein–protein interaction sites
Source: Royal Society of Chemistry journal article supplement (doi:10.1039/c4mb00625a), 2014-11-14
Supplement: c4mb00625a1.xlsx [file c4mb00625a1.xlsx]

## Sheet: homo_train
Homo train dataset
4rla_A
1b3r_A
1ipp_A
1b57_A
1trk_A
2vao_A
1kif_A
1cjx_A
2dld_A
1f52_A
2lyn_A
1wgt_A
1c28_A
1mpy_A
1qap_A
1a8r_A
7mdh_A
1hw1_A
1g0r_A
1b5d_A
1hw8_A
1qr7_A
1foh_A
1pfk_A
1esj_A
1qbz_A
1g31_A
1f5v_A
1hhs_A
1qco_A
1bd0_A
7ahl_A
1qrk_A
1pvi_A
1jc4_A
1f6y_A
1jpy_A
1eum_A
1fcb_A
1cnt_1
1xva_A
1qu7_A
1k3f_A
1hjr_A
1fro_A
2hpa_A
1ahs_A
1g64_A
1b9l_A
1qfh_A
1fdu_A
1aih_A
1g5i_A
1qh4_A
1hlo_A
1gpm_A
1ek4_A
1ek9_A
1ez1_A
1e19_A
1d3y_A
1ixm_A
1fw3_A
1ijg_A
1ekf_A
1vsg_A
1spi_A
1g8e_A
1fvp_A
1cu1_A
1dap_A
1mka_A
1fwk_A
1sce_A
1b14_A
1sct_B
1e3e_A
1d7a_A
1ima_A
1f12_A
1bjy_A
1fxz_A
1h7e_A
1de5_A
1d8h_A
19hc_A
1ddl_A
1ofg_A
1a79_A
1eq2_A
1fzr_A
1jkm_B
1e5x_A
1flo_A
1pre_A
1i5n_A
1epx_A
1jlj_A
1a7k_A
1cjd_A
1eqg_A
1jlx_A
1a95_A
1e7d_A
1fo6_A
1c0m_A
3bjl_A
1f3t_A
1id1_A
1iby_A
1arz_A
1ee1_A
1b65_A
1di0_A
1ckm_A
1r2f_A
1hw5_A
1f4o_A
1cm7_A
1wwa_X
1ef0_A
1cli_A
1dj2_A
3std_A
1i8t_A
1mrr_A
1b6s_A
1pgj_A
1dir_A
1afr_A
1b7g_O
1dxx_A
1noy_A
2pmt_A
1d0i_A
1qsm_A
1j6w_A
1g57_A
1jqk_A
1bdf_A
1ei1_A
1dkr_A
1evk_A
1j95_A
1dzr_A
2fiv_A
1igw_A
1g5c_A
1hm6_A
1smt_A
1qfx_A
1qgh_A
1tyf_A
1ftr_A
1g6q_1
1e15_A
1gd0_A
1jg8_A
1fui_A
1sox_A
1fgg_A
1g98_A
1ekj_A
1cf1_A
1ezf_A
1g8l_A
1g8y_A
1dc1_A
1elq_A
1gef_A
1oro_A
1gg3_A
1fiu_A
1mld_A
1dqn_A
1dqs_A
1byk_A
1sry_A
1jk0_A
1oel_A
1ci0_A
1qlw_A
1ia9_A
1ggq_A
1chm_A
1e5d_A
1lcp_A
1a6d_A
1b2p_A
1f2d_A
1qa7_B
1jzt_A
1bo4_A
1cz3_A
1b3t_A
1ebu_A
1qb2_A
1ed8_A
1b4a_A
1i80_A
1qq2_A
1kim_A

## Sheet: homo_test
Homo test dataset
1qq5_A
2one_A
1e7w_A
1ee0_A
1tdt_A
1iqp_A
1shs_A
1qax_A
1f4k_A
1g0s_A
1cm5_A
4pga_A
1i8d_A
1hi9_A
1esm_A
1f5m_A
1d02_A
1av5_A
1i9b_A
2rsp_A
1dxe_A
1fr1_A
1hy1_A
1qdb_A
1efk_A
1hiw_A
1hxp_A
1agq_A
1brm_A
1b8g_A
1nba_A
1thj_A
1qu9_A
1j7l_A
1hyn_P
1com_A
1g63_A
1sma_A
1f8x_A
1vpn_A
1kny_A
1f9a_A
1bg3_A
1d2r_A
1fte_A
1qvc_A
1a0e_A
1ez0_A
1ejb_A
1p32_A
1gd7_A
1el6_A
1h54_A
1yve_I
1g99_A
1c8u_A
1obp_A
1i0r_A
1fx3_A
1i1d_A
1dpg_A
1cg2_A
1d6j_A
1f07_A
1dd1_A
1rve_A
1bjn_A
1fk8_A
1qm4_A
1dqw_A
1pow_A
1lbe_A
1hqs_A
1otg_A
13pk_A
2pva_A
1hrk_A
1ggx_A
4ts1_A
1d9e_A
1qo7_A
1hf2_A
2lig_A
2g3p_A
1ad1_A
1f2n_A
1nks_A

## Sheet: hetero_train
Hetero train dataset
1tco_B
1mab_A
1pdk_B
1c0f_S
1hfe_S
1eqz_A
1f3u_A
1ibr_B
1rlc_S
1b4u_B
1g20_E
1g0u_K
1ira_Y
1c30_A
4ubp_C
1dhk_B
1www_V
1jb0_A
1jb0_L
1fak_T
1dio_A
1iea_B
1bqh_G
1f6m_A
1bqq_T
3pro_C
1euc_B
1jr3_E
1bcp_B
1efu_B
1bcr_A
1ava_C
1fs0_E
1agr_E
1fcd_A
2occ_D
1raf_B
1c4z_A
1gp2_B
1hyr_A
1ehk_B
1cau_A
1dn0_B
1qun_B
1quq_B
1g73_C
1hzz_C
1gc1_C
1d2z_B
1fg9_C
1vcb_C
1rrp_B
1jeq_B
1nsn_S
1a0r_P
1qhh_C
1bgx_T
1bvy_A
1nfi_A
1e1q_G
1ezv_B
1ezv_E
1dan_L
1fj1_E
1ocr_E
1jj2_D
1jj2_I
1jj2_M
1e3a_B
1poi_B
1fz0_A
1e50_B
1qla_B
1jk9_A
1de4_C
1i50_A
1i50_E
1i50_I
1gux_B
1i4d_A
1b35_C
1i4o_A
1qo0_D
1hdm_A
1ar1_A
1lt4_A
1e6e_A
1f2t_B
1dtw_B
1ic4_Y
1e6v_B
1dfj_E
1jn5_B
1qop_A
1eqy_A
1eqz_B
1f3u_B
1id5_I
1e94_E
1c29_B
1g0u_I
1g0u_L
1i7w_A
1c30_B
1fod_1
1bpl_B
1e9h_B
1jb0_D
1f5q_B
1jb7_A
1dio_B
1c3a_B
1eg9_A
1aui_A
1itb_A
1fbv_A
1b7t_Y
1lia_B
1bcp_D
1efv_A
1bcr_B
1d0g_A
1fs0_G
1fqv_A
1fcd_C
2izc_B
1jql_A
2ngr_B
1cb7_A
1j7v_R
1ii4_A
1cau_B
1dn1_A
1ak4_C
1kb5_B
1jsd_B
1ytf_D
1gc1_G
1kac_B
1vcb_A
1cd9_A
1cs4_A
1jtd_A
1jtg_B
1qhh_A
1qhh_D
2pcb_A
1eys_M
1gcv_A
1g8j_A
1a2k_A
1ezv_C
1ezv_F
1bwv_A
1tmq_B
1jj2_B
1jj2_E
1jj2_J
1jj2_S
1tnr_A
1fxk_C
1fz0_E
1dce_A
1qla_C
1jk9_B
1fyh_A
1i50_B
1i50_F
1i50_K
1he1_A
1b35_A
1h8e_H
1fm6_D
1f34_A
1ib1_A
1apy_A
1abr_B
1e6e_B
1t7p_A
1f45_B
2ahj_B
1e6v_C
1e6y_A
1fo0_A
1hfe_L
1aro_P
1eqz_C
1ibr_A
1e94_A

## Sheet: hetero_test
Hetero test dataset
1b4u_A
2gac_B
1g0u_J
1ira_X
1i7w_B
4ubp_B
1b70_B
2hmi_B
1cn4_C
1jb0_F
1atn_D
1jb7_B
1dio_G
1f6f_A
1eg9_B
1bqq_M
3pro_A
1euc_A
1jr3_D
1bcp_A
1efu_A
1efv_B
1ava_A
1d0g_R
1g3n_A
1fqv_B
2occ_C
11as_A
1dkg_A
1ahj_A
1cb7_B
1ehk_A
1fsk_A
1smp_A
1dn1_B
1quq_A
1g73_A
1hzz_A
1d2v_C
1pyt_B
1hlu_P
1vcb_B
1bui_C
1jeq_A
1jtd_B
1mhy_B
1qhh_B
1ffu_C
1jfi_B
1doa_B
1wq1_G
1g8j_B
1ezv_A
1ezv_D
1ezx_A
1bii_B
2kin_A
1jj2_C
1jj2_F
1jj2_L
1fiq_B
1poi_A
1eo2_B
1e50_A
1qla_A
1bkd_S
1a4y_A
1ep1_A
1i50_C
1i50_H
1ep3_B
1b34_A
1b35_B
1fm2_A
1qo0_A
1f34_B
1ib1_E
1ghq_B
1bml_C
1f2t_A
1dtw_A
